# Supplementary material for: High PANX1 Expression Leads to Neutrophil Recruitment and the Formation of a High Adenosine Immunosuppressive Tumor Microenvironment in Basal-like Breast Cancer
Source: MDPI journal article supplement (doi:10.3390/cancers14143369), 2022-07-11
Supplement: s1 [file s1]

科研项目审查通知函

IRB Action Letter

尊敬的 陈武臻 研究者：

您提交的编号为 审研2020-337 研究方案 三阴乳腺癌高表达  
PANX1通过ATP极化衰老中性粒细胞形成高嘌呤核苷免疫抑制微环境  
的机制研究 经浙江大学医学院附属第二医院人体研究伦理审查。  
审查结果为 同意。

主任/副主任委员签名

2020年03月12日

吴志英

浙江大学医学院附属第二医院人体研究伦理委员会

(1)
